# Supplementary material for: Engineered Cell‐Derived Microparticles Bi2Se3/DOX@MPs for Imaging Guided Synergistic Photothermal/Low‐Dose Chemotherapy of Cancer
Source: PubMed Central journal article supplement (PMC7001653; doi:10.1002/advs.201901293), 2019-12-12
Supplement: ADVS-7-1901293-s001.pdf [file ADVS-7-1901293-s001.pdf]

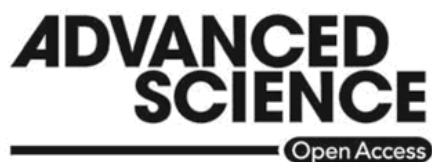

## Supporting Information

for *Adv. Sci.*, DOI: 10.1002/advs.201901293

Engineered Cell-Derived Microparticles Bi<sub>2</sub>Se<sub>3</sub>/DOX@MPs  
for Imaging Guided Synergistic Photothermal/Low-Dose  
Chemotherapy of Cancer

*Dongdong Wang, Yuzhu Yao, Junkai He, Xiaoyan Zhong,  
Basen Li, Shiyu Rao, Haiting Yu, Shuaicheng He, Xiaoyu  
Feng, Tuo Xu, Bin Yang, Tuying Yong, Lu Gan, Jun Hu,\* and  
Xiangliang Yang\**

## Supporting Information

### **Engineered Cell-Derived Microparticles Bi<sub>2</sub>Se<sub>3</sub>/DOX@MPs for Imaging Guided Synergistic Photothermal/Low-Dose Chemotherapy of Cancer**

*Dongdong Wang, Yuzhu Yao, Junkai He, Xiaoyan Zhong, Basen Li, Shiyu Rao, Haiting Yu, Shuaicheng He, Xiaoyu Feng, Tuo Xu, Bin Yang, Tuying Yong, Lu Gan, Jun Hu,\* and Xiangliang Yang\**

D. Wang, Y. Yao, J. He, X. Zhong, S. Rao, H. Yu, S. He, X. Feng, T. Xu, B. Yang, Dr. T. Yong, Prof. L. Gan, A/Prof. J. Hu and Prof. X. Yang  
National Engineering Research Center for Nanomedicine  
College of Life Science and Technology  
Huazhong University of Science and Technology  
Wuhan 430074, P. R. China  
E-mail: hjun0718@hust.edu.cn; yangxl@hust.edu.cn  
Dr. B. Li  
Department of Radiology, Tongji Hospital  
Tongji Medical College  
Huazhong University of Science and Technology  
Wuhan 430074, P.R. China

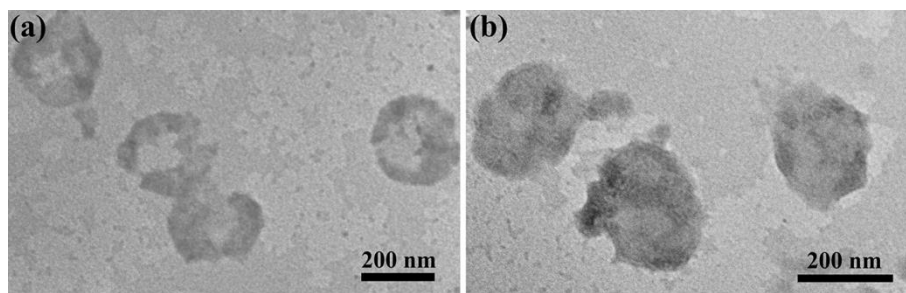

**Figure S1.** TEM images of multiple MPs (a) and Bi<sub>2</sub>Se<sub>3</sub>/DOX@MPs(b).

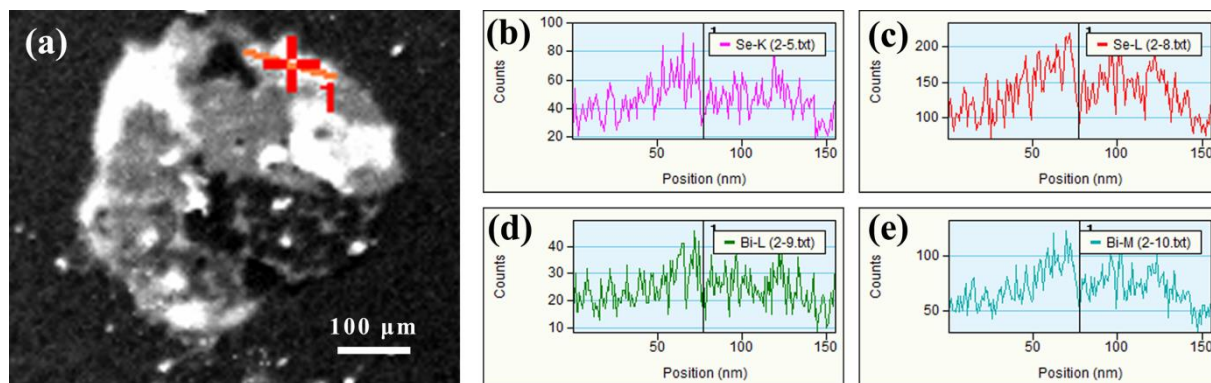

Figure S2. FTEM-EDS line-scan analysis of  $\text{Bi}_2\text{Se}_3/\text{DOX}@\text{MPs}$ .

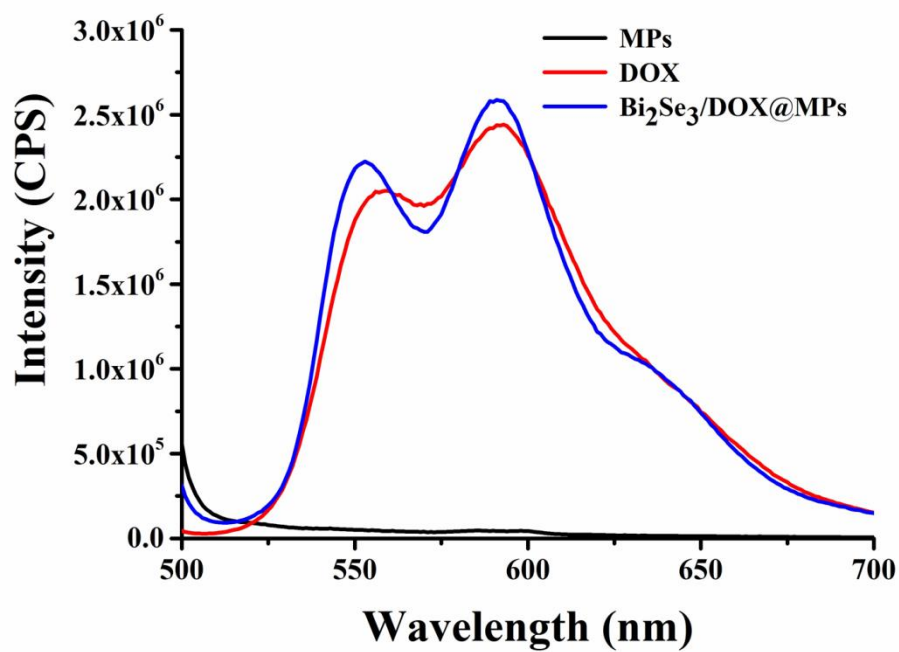

**Figure S3.** Fluorescence spectra of MPs, free DOX and Bi<sub>2</sub>Se<sub>3</sub>/DOX@MPs at the excitation of 488 nm.

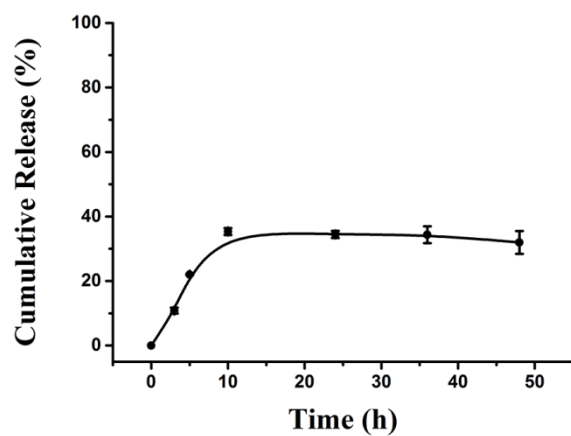

**Figure S4.** Cumulative amounts of DOX released from  $\text{Bi}_2\text{Se}_3/\text{DOX}@\text{MPs}$  in pH 7.4 PBS buffer at 37 °C.

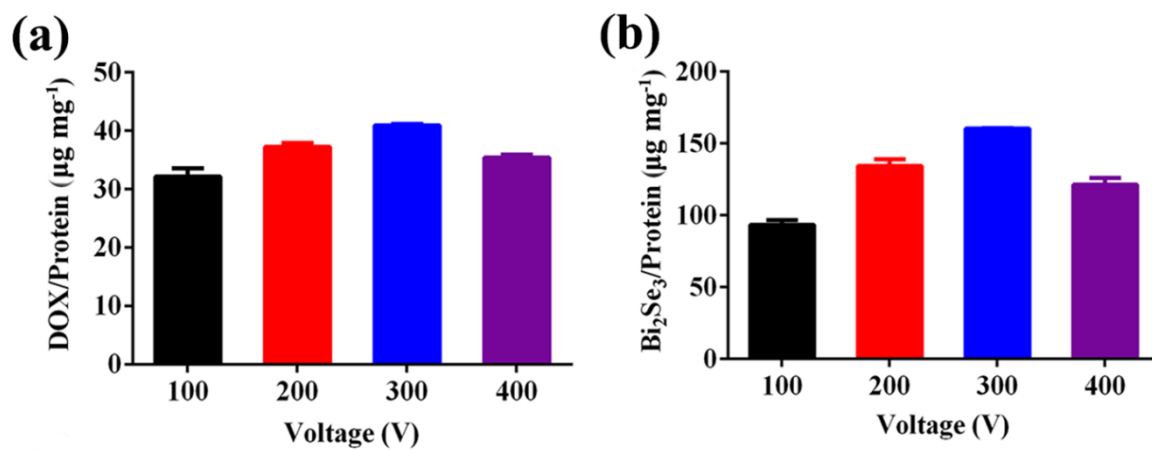

**Figure S5.** Voltage-dependent DOX (a) and Bi<sub>2</sub>Se<sub>3</sub> (b) loading efficiency in Bi<sub>2</sub>Se<sub>3</sub>/DOX@MPs.

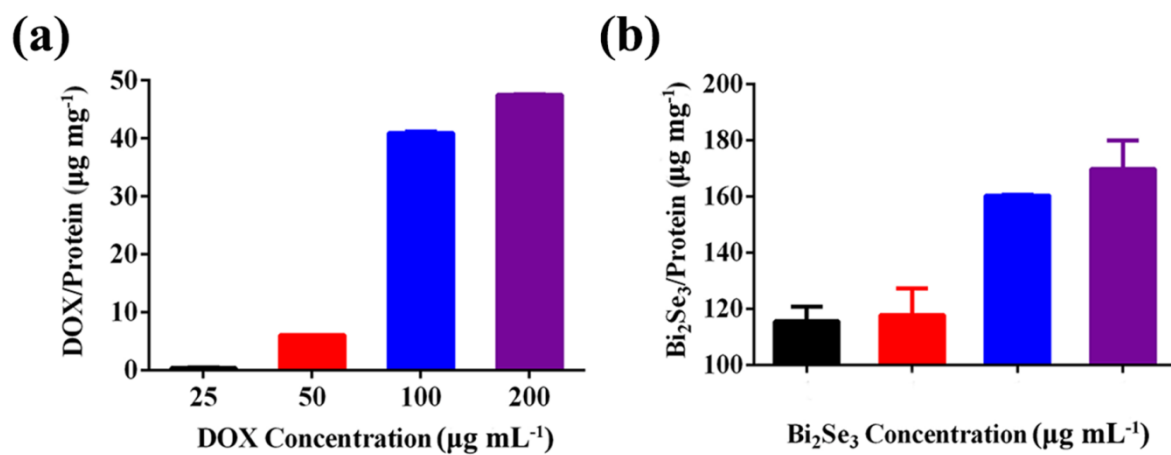

**Figure S6.** DOX and Bi<sub>2</sub>Se<sub>3</sub> concentration-dependent loading efficiency in Bi<sub>2</sub>Se<sub>3</sub>/DOX@MPs.



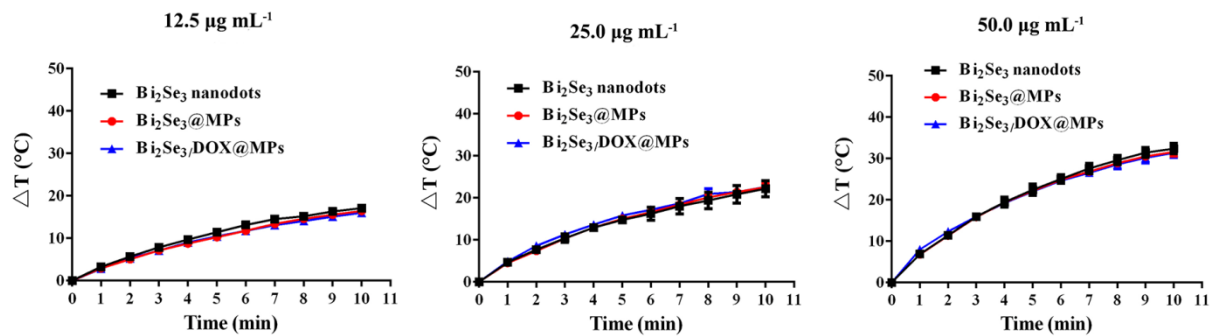

**Figure S7.** Comparison on temperature elevation of  $\text{Bi}_2\text{Se}_3$  nanodots,  $\text{Bi}_2\text{Se}_3$ @MPs and  $\text{Bi}_2\text{Se}_3/\text{DOX}$ @MPs at different concentrations (12.5, 25, 50  $\mu\text{g mL}^{-1}$ ) under 808 nm NIR irradiation for 10 min.

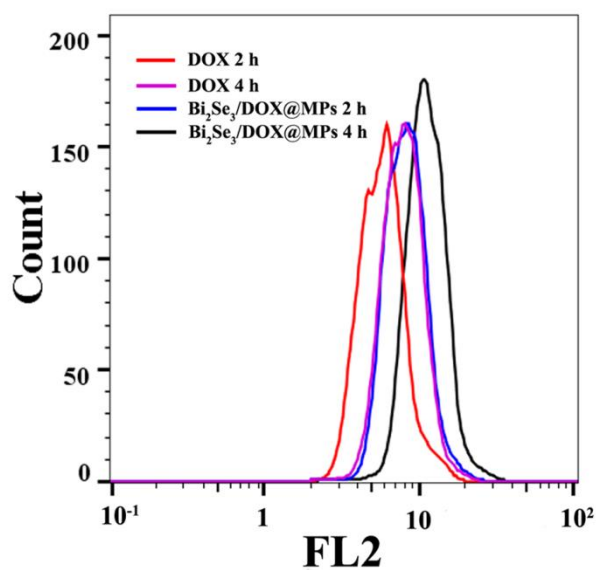

**Figure S8.** Flow cytometric profile of H22 cells respectively incubated with free DOX and Bi<sub>2</sub>Se<sub>3</sub>/DOX@MPs for 2 h and 4 h.

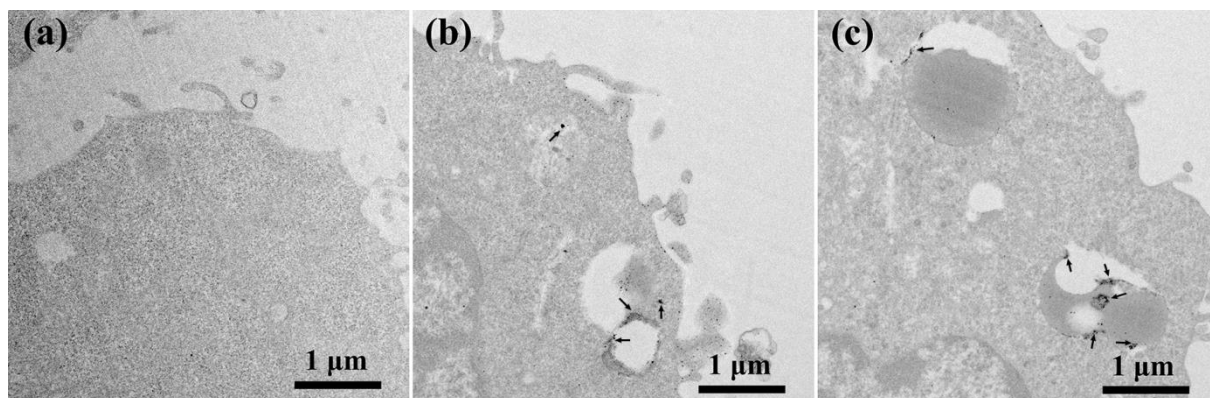

**Figure S9.** TEM images of control H22 cells (a) and H22 cells incubated with Bi<sub>2</sub>Se<sub>3</sub>/DOX@MPs for 2 h (b) or 4 h(c). The black arrows indicate Bi<sub>2</sub>Se<sub>3</sub> nanodots.

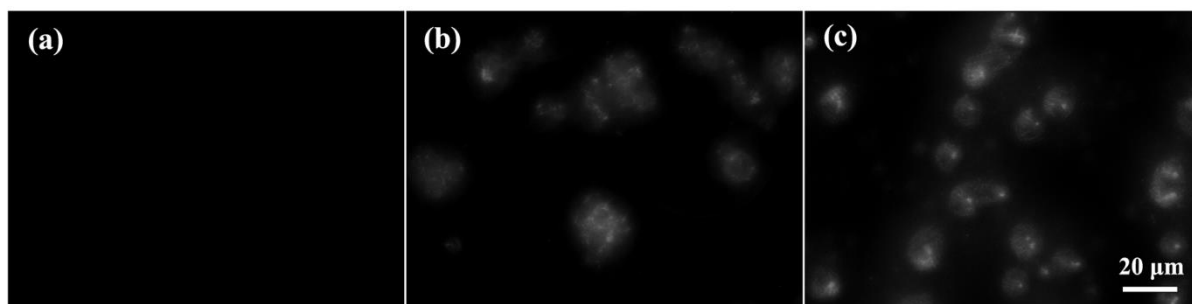

**Figure S10.** Dark-field optical microscopy images of control H22 cells (a) and H22 cells incubated with Bi<sub>2</sub>Se<sub>3</sub>/DOX@MPs for 2 h (b) or 4 h(c).

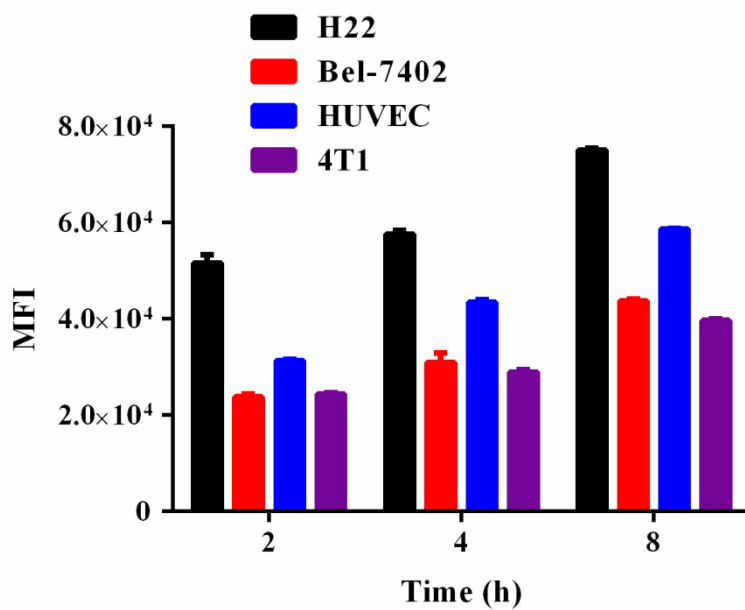

**Figure S11.** Cellular uptake of  $\text{Bi}_2\text{Se}_3/\text{DOX}@\text{MPs}$  incubated with different cells (H22, Bel-7402, HUVEC and 4T1 cells) for 2, 4 and 8 hours.

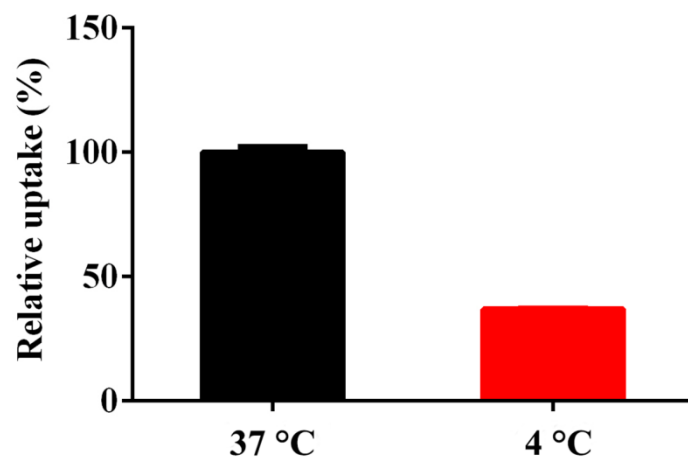

**Figure S12.** Relative cellular uptake of Bi<sub>2</sub>Se<sub>3</sub>/DOX@MPs incubated H22 cells at 37 °C and 4 °C.

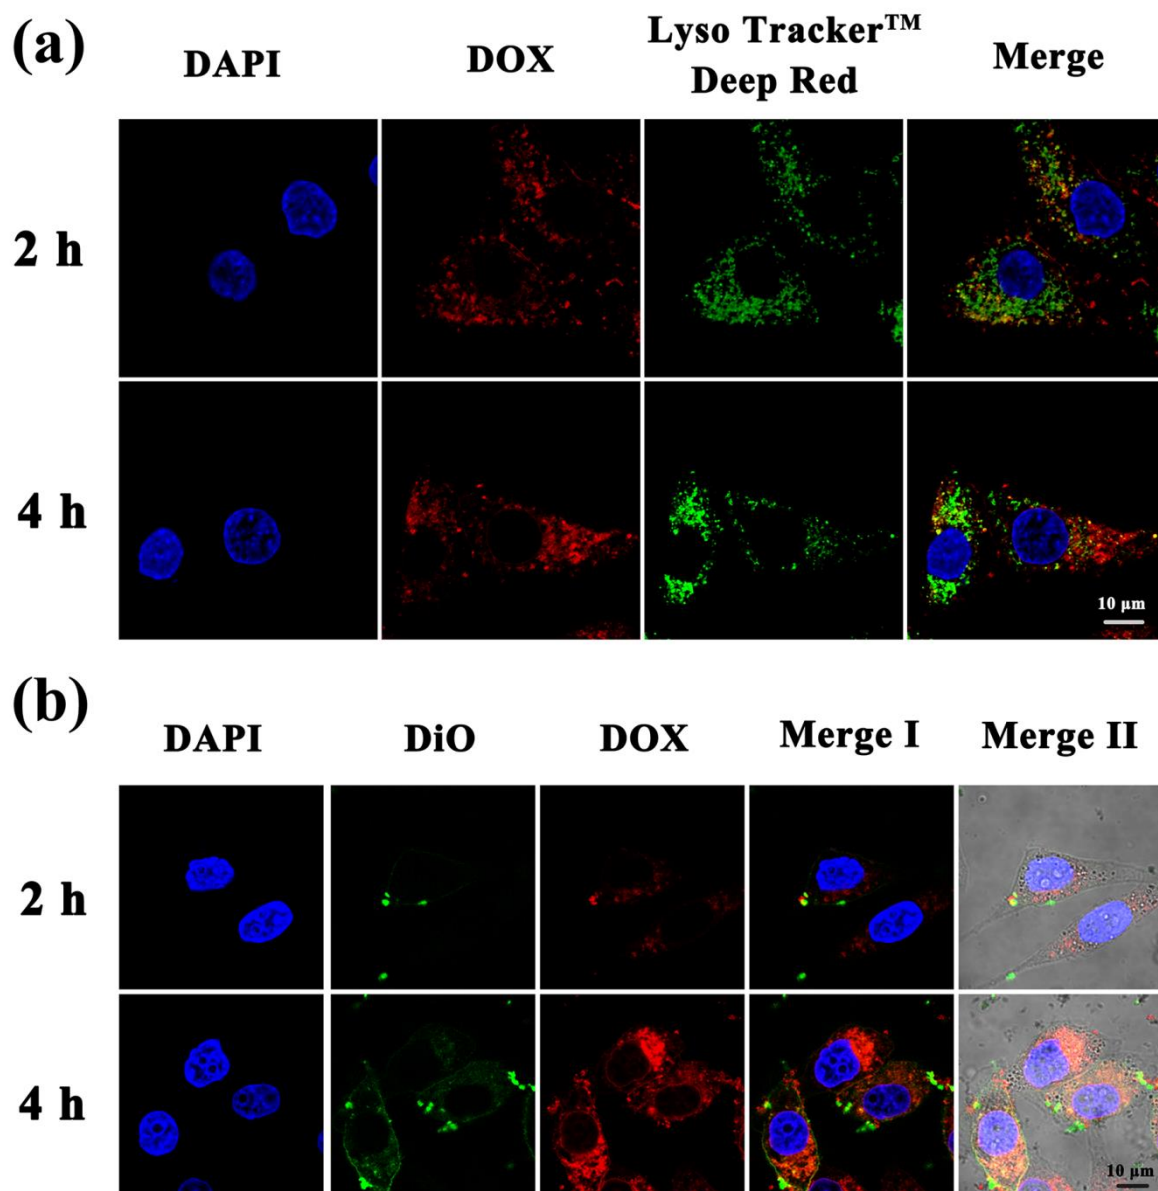

**Figure S13.** Cellular internalization pathway of  $\text{Bi}_2\text{Se}_3/\text{DOX}@\text{MPs}$ . CLSM images of Bel 7402 cells incubated with  $\text{Bi}_2\text{Se}_3/\text{DOX}@\text{MPs}$  (a) and DiO-labeled  $\text{Bi}_2\text{Se}_3/\text{DOX}@\text{MPs}$  (b) for 2 and 4 h. Cell nucleus were labeled with DAPI (blue) in both a and b. Lysosomes were labeled with LysoTracker Deep Red (green) in a. The concentration of DOX was fixed at  $1 \mu\text{g mL}^{-1}$ .

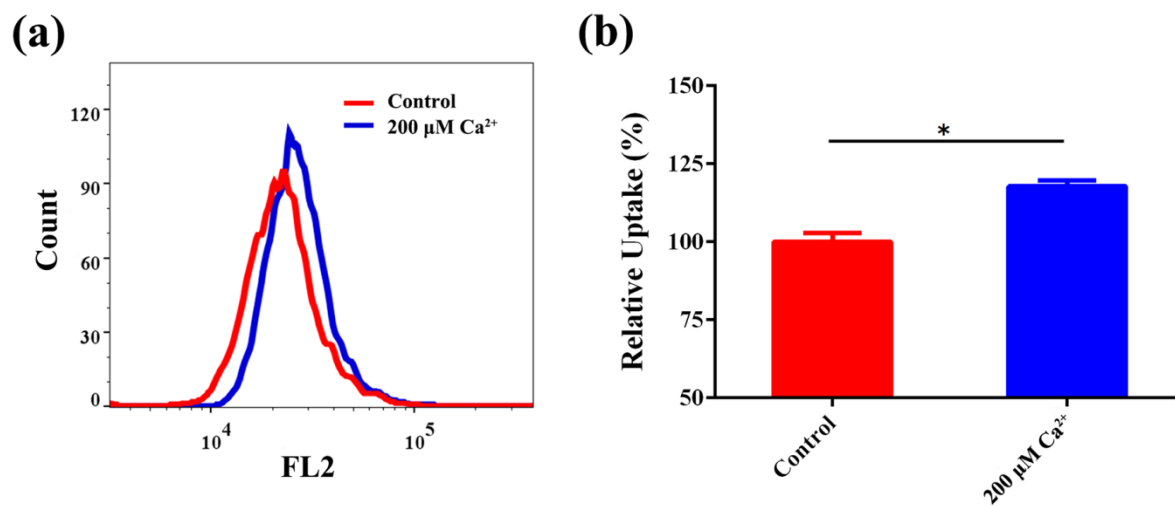

**Figure S14.** Flow cytometric profile (a) and relative cellular uptake (b) of  $\text{Bi}_2\text{Se}_3/\text{DOX}@\text{MPs}$  with or without 200  $\mu\text{M}$   $\text{Ca}^{2+}$ .



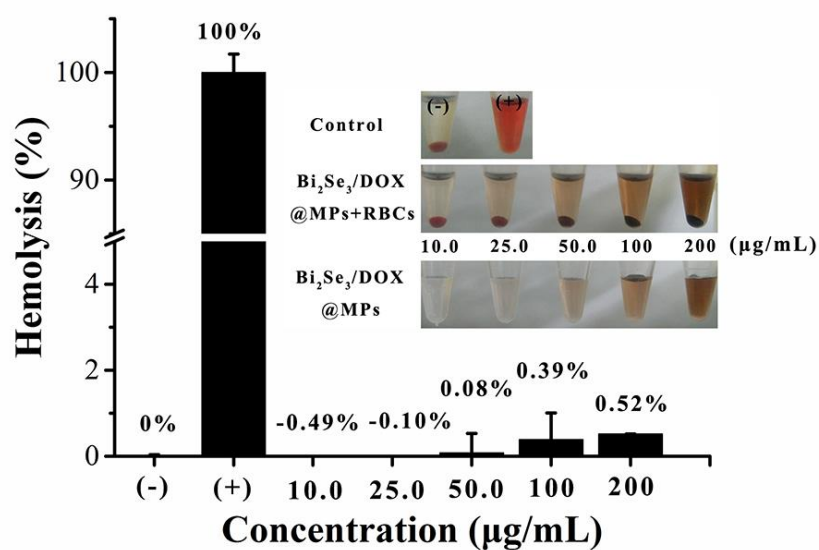

**Figure S15.** Hemolysis percentages of  $\text{Bi}_2\text{Se}_3/\text{DOX}@MPs$  in physiological saline at concentrations of 10, 25, 50, 100 and 200  $\mu\text{g mL}^{-1}$ , inset is the photograph of control (up), hemolysis assay to detect the presence of hemoglobin in the supernatant of  $\text{Bi}_2\text{Se}_3/\text{DOX}@MPs$  (middle) and the  $\text{Bi}_2\text{Se}_3/\text{DOX}@MPs$  physiological saline solutions (down).

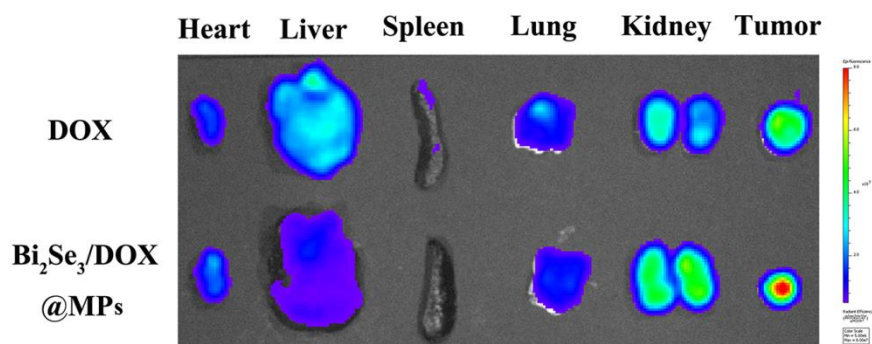

**Figure S16.** Ex vivo fluorescence images of heart, liver, spleen, lung, kidney, and tumor 12 h after treatment with free DOX and Bi<sub>2</sub>Se<sub>3</sub>/DOX@MPs.

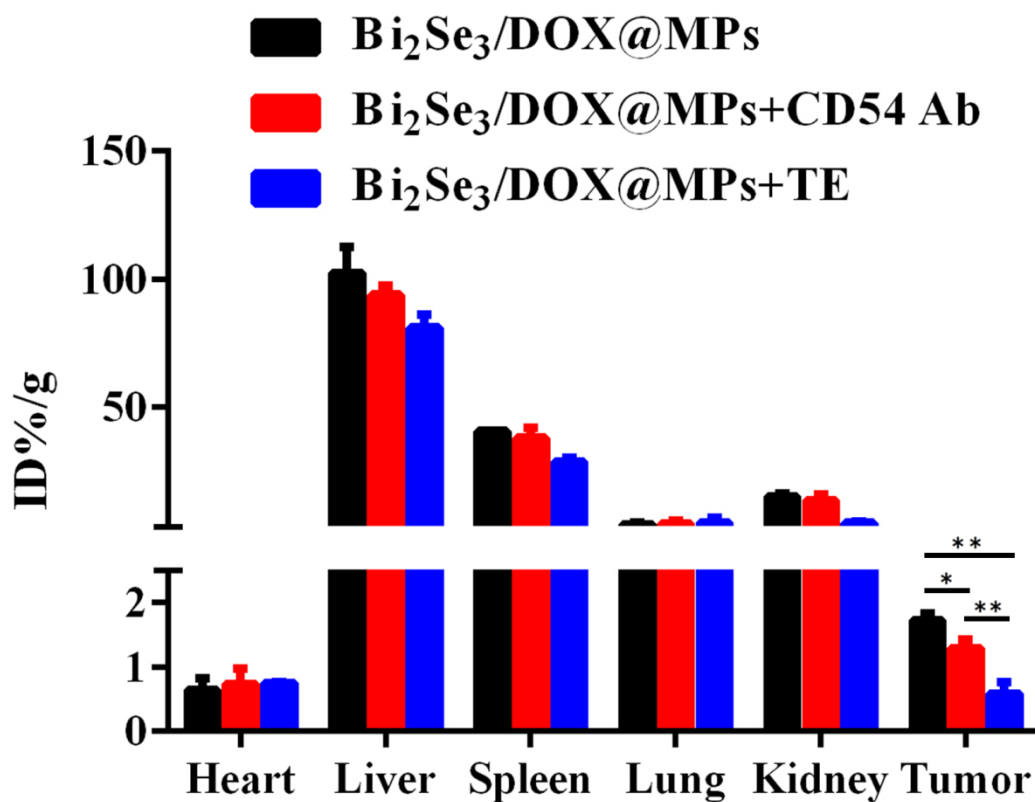

**Figure S17.** *In vivo* biodistribution of  $\text{Bi}_2\text{Se}_3/\text{DOX}@MPs$  before or after treating with CD54 Ab or 0.25 % TE.

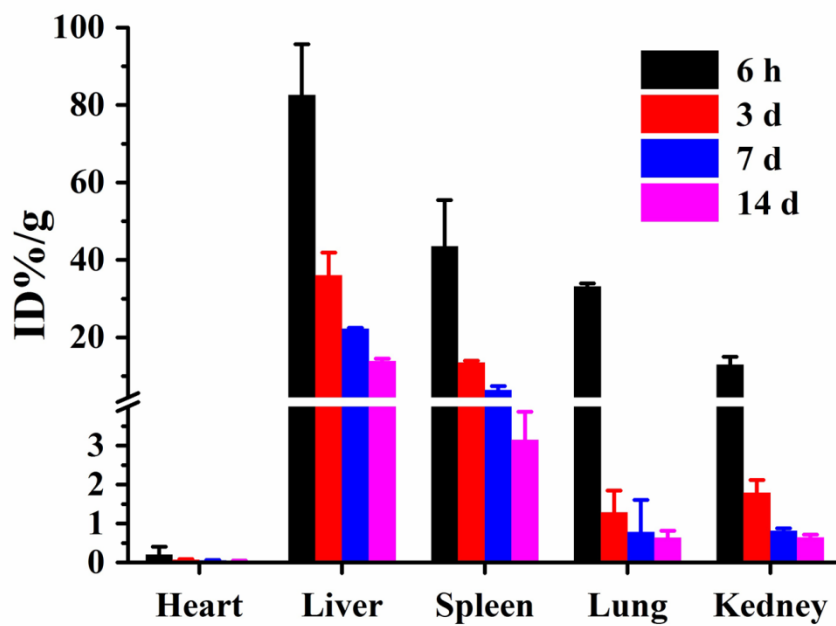

**Figure S18.** *In vivo* clearance of Bi element after injecting  $\text{Bi}_2\text{Se}_3/\text{DOX}@\text{MPs}$  intravenously at 6h, 3 d, 7 d and 14 d.

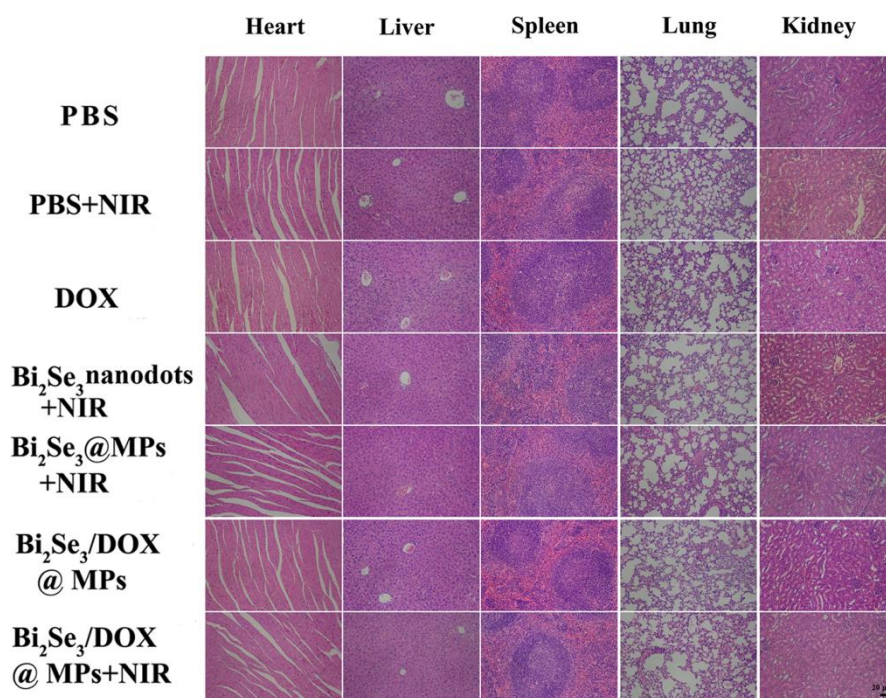

**Figure S19.** H&E staining images of heart, liver, spleen, lung, and kidney after the mice were sacrificed at 15th day post intravenous injection with PBS, free DOX, Bi<sub>2</sub>Se<sub>3</sub> nanodots, Bi<sub>2</sub>Se<sub>3</sub>@MPs and Bi<sub>2</sub>Se<sub>3</sub>/DOX@MPs with or without NIR irradiation. DOX and Bi<sub>2</sub>Se<sub>3</sub> dosage were fixed at 1.2 and 6.6 mg kg<sup>-1</sup>. Magnification 200×.

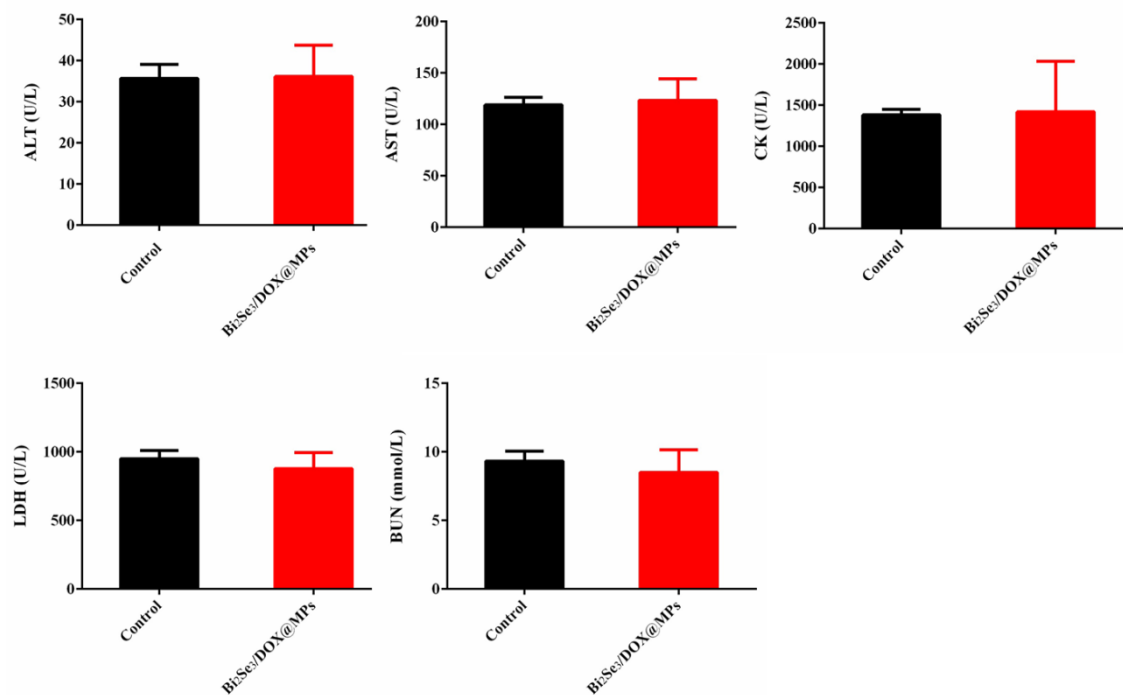

**Figure S20.** ALT, AST, CK, LDH and BUNs levels in the blood at day 7 after Bi<sub>2</sub>Se<sub>3</sub>/DOX@MPs treatment.
